# Supplementary material for: BAC-End Microsatellites from Intra and Inter-Genic Regions of the Common Bean Genome and Their Correlation with Cytogenetic Features
Source: PubMed Central journal article supplement (PMC4177843; doi:10.1371/journal.pone.0101873), 2014-09-25
Supplement: pone.0101873.s001.pdf [file pone.0101873.s001.pdf]

| Singleton, BMB marker | SequenceID (BAC Clone ID) | Left Sequence           | Right Sequence          | Expected Product Size | Motif and repeat length | PCR program |
|-----------------------|---------------------------|-------------------------|-------------------------|-----------------------|-------------------------|-------------|
| BMb625s               | PV_GBa0003H21.f           | CCACCAGAGATAGACAGAGC    | CAGCACCGTTACACAAATTA    | 280                   | (TC)10                  | 55-47       |
| BMb626s               | PV_GBa0003O01.r           | AATTATTATGTTGATGTTTCGAT | TTCGGAGAAGAGAGAACAAA    | 296                   | (AT)13                  | 50-42       |
| BMb628s               | PV_GBa0007E16.r           | TATTTGCAAAGCGAATATGA    | ATCATTACAAATTCCTCCGT    | 228                   | (ATA)6                  | 52-44       |
| BMb629s               | PV_GBa0008N04.r           | AAGTATCCTCAGATGGCAA     | CAAATATGGCATGTCAGTTG    | 241                   | (AT)17                  | 54-46       |
| BMb631s               | PV_GBa0009C05.r           | TTCCCTTGAGAGGTTAGTGA    | TCTGCGTGAAGTACTCAGTG    | 269                   | (CTT)7                  | 57-49       |
| BMb632s               | PV_GBa0009N16.r           | TGATTGTTTACACATAGAGACAC | AGGCATTAAATGGGTGTATG    | 269                   | (TA)16                  | 54-46       |
| BMb635s               | PV_GBa0012I03.r           | ACAAACAAGACCAGGCTTTA    | AGAGAACTTATGGTCACCCA    | 277                   | (TA)12                  | 56-48       |
| BMb638s               | PV_GBa0014B24.f           | CATATTGAATTTACCACGCA    | ATGAAGTTTGTGCTTCGAT     | 216                   | (AT)22                  | 53-45       |
| BMb639s               | PV_GBa0014C19.f           | ATCAATCCCATTCAAGAAC     | TTCATGCAGGGAATAATTAAA   | 155                   | (AT)18                  | 52-44       |
| BMb640s               | PV_GBa0014E02.r           | TGAATGTGATCTAATTGGCA    | CGTTAAGGGCTTATCACATC    | 254                   | (TTA)8                  | 53-45       |
| BMb641s               | PV_GBa0014H08.f           | CAAGTTTGACACGACTGCTA    | TTCGGAAATTAATCATTCCCT   | 267                   | (TAA)7                  | 51-43       |
| BMb642s               | PV_GBa0014J06.f           | TAACACAAATGGCTTCATCA    | TTTGAAGGAATATTCAATTAAG  | 288                   | (AT)15                  | 49-41       |
| BMb643s               | PV_GBa0014J10.f           | AAACAGGAATTTAACCAAAGTT  | TCACACAACACTGCGAAAC     | 276                   | (TAT)5                  | 53-45       |
| BMb644s               | PV_GBa0014O01.r           | AATTC AATTAGCACGTGGAT   | GAATGGGAAACCACTATTGA    | 105                   | (AT)12                  | 54-46       |
| BMb645s               | PV_GBa0014O18.r           | AGAATTCAATGCGTAAGTTT    | AGAGAATTTGAGGATGTTTCG   | 114                   | (TA)14                  | 52-44       |
| BMb646s               | PV_GBa0015M19.r           | ACATCCACATAAGCTCCAAT    | GGGATGAATGTTCTCTTCAA    | 283                   | (TTA)4                  | 54-46       |
| BMb648s               | PV_GBa0017E15.r           | CAGGCAGCCAGTGAGGAG      | ATTTCTTAATTACCGTTGCG    | 146                   | (GA)32                  | 55-47       |
| BMb649s               | PV_GBa0017H23.f           | AACCATTACACCAATCAAGTTT  | TCCACGGATCTCTATTACCT    | 205                   | (ATA)4                  | 55-47       |
| BMb650s               | PV_GBa0017O21.r           | GAAGGCGAAGTGAGTTAGTG    | AAACGTTGTACGTCCTCTCGT   | 185                   | (GAA)18                 | 57-49       |
| BMb653s               | PV_GBa0020G09.f           | ATTTGTAAAGAACTCGCCAA    | AGATAACAAGAACAATCATAAAG | 213                   | (AT)14                  | 51-43       |
| BMb654s               | PV_GBa0021I21.f           | CGCATCGATCAAAGATAGTC    | CTCTTTCCCAACAAATGAAG    | 161                   | (TA)19                  | 53-45       |
| BMb655s               | PV_GBa0022E01.f           | CCGTCTCTATCTATCAATCCA   | GAGAGAGATAGGAAAGGGAGA   | 207                   | (TC)10                  | 55-47       |
| BMb658s               | PV_GBa0023L24.r           | GAACGCTCTTCTTGCTTAAA    | TTTACCTCCCTTCTACTTCTATG | 114                   | (TA)8                   | 55-47       |
| BMb659s               | PV_GBa0024G16.r           | AATTTGTAAAGAACTCGCCA    | AAATATTTGATGTTCCATCTTT  | 265                   | (AT)14                  | 50-42       |
| BMb660s               | PV_GBa0024L19.f           | GATATGGGAAGTGGTGGATA    | ATGGAAATATTGTGCCTGTC    | 125                   | (TAA)4                  | 55-47       |
| BMb661s               | PV_GBa0025D19.r           | AAGCAACACCCAGAGAGTTA    | ACTCCATTAGACCCAATCCT    | 229                   | (AAG)8                  | 57-49       |
| BMb663s               | PV_GBa0025I02.r           | AATCGAAACCAAATTCCTTC    | TTCATATTGTTTCAGATTATTCA | 191                   | (TTA)4                  | 49-41       |
| BMb666s               | PV_GBa0026K03.f           | TGTCCTCTTGAGCTTGATCT    | CATTCCTCTCTTTTCTCGTT    | 268                   | (AT)6                   | 56-48       |
| BMb668s               | PV_GBa0027C20.f           | AACCTAGGGAAGTCCAACAT    | CAAATATGGCATGTCAGTTG    | 163                   | (GAA)4                  | 54-46       |
| BMb669s               | PV_GBa0027K08.r           | AAATTTAGCAAGGTTTCAG     | TCAAGTATTCTTTCACCAACAA  | 106                   | (TCT)7                  | 53-45       |
| BMb670s               | PV_GBa0028C10.r           | GTGCCAGAGGAGAGAGAAG     | CTCAAATTCACCAATCAAT     | 117                   | (GA)11                  | 52-44       |
| BMb671s               | PV_GBa0028E12.f           | AGATTGTTGCAGGGTAAAGA    | ACACGAGTCCCAACAGATAG    | 298                   | (AT)26                  | 56-48       |

|         |                 |                         |                         |     |         |       |
|---------|-----------------|-------------------------|-------------------------|-----|---------|-------|
| BMb672s | PV_GBa0028L16.r | CGAGTGATCGAGTTTCTTTC    | ATACATACCCACCAATCAGC    | 268 | (TTC)8  | 55-47 |
| BMb674s | PV_GBa0029C23.r | TTAGAAGGTGGTTGCTTGAT    | CCTATAGGTGTAAACTATTTGGT | 171 | (AT)21  | 54-46 |
| BMb676s | PV_GBa0030G18.r | TCAAGTCATTTTCAGTGACCA   | CACAATTTAAACCCTAAACCCT  | 261 | (TAA)6  | 55-47 |
| BMb677s | PV_GBa0030N20.f | GGAGATATCAATAATTTATGCG  | CTCCTCCACTTTACTTCGTG    | 287 | (TAT)5  | 51-43 |
| BMb679s | PV_GBa0031I19.f | ACTCGTGTCTTCGCATAAT     | CGTGTTATTGTTATTCAAATGG  | 210 | (AT)17  | 52-44 |
| BMb681s | PV_GBa0033N02.f | GTCCCAGTAGCATGAAACAT    | TTTACCTCAGAAGCAGTTGG    | 135 | (AT)7   | 56-48 |
| BMb682s | PV_GBa0033P04.f | TCAATAAATTGGAACGAACA    | TATTCGGTATGACTGGCATT    | 226 | (TAA)5  | 52-44 |
| BMb683s | PV_GBa0035B13.f | GTTAGCTGATTTACCCTTG     | GTTAGGCTTAAAGTCCACCA    | 128 | (AT)11  | 55-47 |
| BMb684s | PV_GBa0035F11.f | CGGGATAAATTTAGTGATGGA   | CCTGAGCTGTCACACAAAC     | 229 | (TAT)14 | 53-45 |
| BMb685s | PV_GBa0035K15.r | AAAGTTTATCAAACGAGGCA    | TATTTCGAATCTTTGCACCT    | 240 | (TAA)16 | 54-46 |
| BMb686s | PV_GBa0035M10.f | ACTAAGAAGTCGCACACGAT    | ACTATACCGCTTTGCACAAT    | 247 | (AT)9   | 56-48 |
| BMb687s | PV_GBa0036A04.f | GTTTATCCGAATTTCCCTTT    | GGGCAACTCATTCTAATTTT    | 151 | (AT)8   | 52-44 |
| BMb688s | PV_GBa0036G05.f | TCCTCCTTTCTCTCACAGTC    | AATGTGGTTGGTAAATTTGG    | 265 | (AT)11  | 53-45 |
| BMb692s | PV_GBa0038A07.f | ACTAAGAAGTCGCACACGTT    | GCACAATCAATAAGACCCAT    | 244 | (AT)13  | 55-47 |
| BMb693s | PV_GBa0038A15.r | CATGTCTTTGGCATTGTATG    | ATGGCAGTTAAAGAGGAGAA    | 270 | (TAA)5  | 54-46 |
| BMb695s | PV_GBa0039B02.r | CTCCACCAAGATTGATGACT    | CCTCCACCACAGTTTCTTT     | 246 | (GA)6   | 56-48 |
| BMb696s | PV_GBa0039C13.f | GTTTCATGGGACCTTGTAAGA   | GAAATTTCAACAATTTGACT    | 289 | (AT)18  | 52-44 |
| BMb698s | PV_GBa0039K10.f | TGATAGGAAATATTAAGTTCAAA | GGTTAAAGAATAATCCCCT     | 206 | (TTA)7  | 50-42 |
| BMb699s | PV_GBa0041N17.r | CGCCAAACATTTATTAAGGA    | GGGTACACGTGAAAAGTAAAT   | 205 | (TA)11  | 52-44 |
| BMb700s | PV_GBa0042M18.f | ATTCTTTGTGGTTGCCTATG    | TGATTTACAAAGCGTAAGCC    | 194 | (AT)14  | 55-47 |
| BMb701s | PV_GBa0042P10.r | CGTTACCAACGTCTTCTCTC    | TATGTCTGCTCTTTCCGAGT    | 176 | (GAA)17 | 57-49 |
| BMb702s | PV_GBa0043G04.f | AGGAAGCATCAACCACTAGA    | CTGTGTGCCCGTTAGTTAAT    | 191 | (TTA)4  | 57-49 |
| BMb703s | PV_GBa0043I04.r | TGTGCTTATTTTCAGGATGTG   | TAATTCCAAACACGGTTTCT    | 265 | (AT)18  | 54-46 |
| BMb705s | PV_GBa0044A22.r | TTGAATGAATGCTAAAGCTG    | ATTGGACAATGCTACAAACC    | 172 | (TA)13  | 53-45 |
| BMb706s | PV_GBa0044E15.f | TGATGCATGATTACTTCTTGA   | TTCGTGCTCAAATAATTGTC    | 261 | (AAT)5  | 53-45 |
| BMb707s | PV_GBa0044L11.f | AATGGTGGTATACAGTGATGTT  | TTGTTTGAGAAACGAAAGGT    | 298 | (AAT)6  | 54-46 |
| BMb710s | PV_GBa0045H21.f | TTCTGAGAGAGAGGAGGACA    | AAGGGTGCATAATGAAACTC    | 222 | (AAG)14 | 55-47 |
| BMb712s | PV_GBa0046E12.f | CTTTCGTGACAAGGAGAAAC    | AGGTTAACACGATTTGTATTTG  | 177 | (AT)9   | 53-45 |
| BMb714s | PV_GBa0047C04.f | CCTGTTGAATTGTTGGAGAT    | TTGTGTATTACAAAGGCACAC   | 275 | (AT)30  | 54-46 |
| BMb715s | PV_GBa0048C21.f | GGTGATTATTTGGATTGTGG    | TGTACGAGGTAGGAACGACT    | 204 | (ATT)6  | 53-45 |
| BMb716s | PV_GBa0048E03.f | GAGGGTAAAGTCCTAGAAGGG   | CCAACCTTGTTGATCTCATT    | 243 | (GAA)6  | 54-46 |
| BMb717s | PV_GBa0048J03.r | GTGTAACCTACGCTTCTTGG    | ATGAAGCCAACCTTATGGAA    | 229 | (TA)18  | 54-46 |
| BMb718s | PV_GBa0048L21.r | TTTCTTTCTTTGTCTGAGC     | CGCCAACCTTCTTTACTAGA    | 135 | (AT)20  | 55-47 |
| BMb719s | PV_GBa0048P18.r | TGTTCACTTATCCTTACAAGAAA | TTTAATTAGCTACCAAGGTTT   | 189 | (AAT)4  | 51-43 |
| BMb722s | PV_GBa0050A03.r | ATGCACCATAGAGGTTGTTT    | ATCGTTTCGTATCGTGAATC    | 153 | (TA)10  | 54-46 |

|         |                 |                         |                          |     |         |       |
|---------|-----------------|-------------------------|--------------------------|-----|---------|-------|
| BMb724s | PV_GBa0050K15.r | ATAGGCACTACACCAATGCT    | GAGAATGGACCTCTTGATGA     | 282 | (AT)19  | 55-47 |
| BMb727s | PV_GBa0051F20.f | TGTTCAATCCCATAACCTTT    | ACTTATCCACGTGTTCTGCT     | 206 | (AT)23  | 53-45 |
| BMb728s | PV_GBa0051L01.r | TGTGGATTGTTATAGAATGTAGC | ATAGCTCTTGATTGATCCCA     | 208 | (TA)16  | 54-46 |
| BMb730s | PV_GBa0052O04.f | GGAGAAGTTAAGGAAAGCGT    | GAATATCTCACCTCAAACATAACA | 168 | (AT)14  | 54-46 |
| BMb731s | PV_GBa0053H01.r | TTACTTCTTTATTTGGGTGTT   | TTATTCAACATTGTCAGCCA     | 263 | (TAT)5  | 51-43 |
| BMb732s | PV_GBa0053H22.r | TAACCATATCAAGGAATCGG    | AAATGTGTGAAATGGAAAGG     | 271 | (TA)21  | 53-45 |
| BMb734s | PV_GBa0053P10.f | TTATGAATTAGCAAATCGCC    | TTTCAAATCAACAGTTTCAAGT   | 294 | (AT)13  | 53-45 |
| BMb737s | PV_GBa0054K02.f | AACAAGTCACCGATCAAGAC    | GTTTGTAAATGATTCCGCAT     | 225 | (AT)19  | 53-45 |
| BMb740s | PV_GBa0055D05.r | CCACTGACGTAAATTGTGTG    | ATGGAGTTAGGATTACCCGT     | 284 | (ATT)4  | 56-48 |
| BMb742s | PV_GBa0055H11.r | GTGATGTGATGAATTGGTGA    | TGTGAACGTGAATGCTATGT     | 271 | (TAT)14 | 54-46 |
| BMb743s | PV_GBa0055P11.f | ATTCAAATTTACCTTTGCGA    | CCCTATTCTTATATGACGATTT   | 296 | (TA)14  | 51-43 |
| BMb744s | PV_GBa0056C04.f | TATCCTTTACAGTTCCGAC     | ATGGGAGAAGAAGGAGAGAG     | 196 | (TTC)6  | 56-48 |
| BMb745s | PV_GBa0056I14.f | AAAGCAATCGTAAACCATGT    | ATGAGTAGCAATTTGGCAAT     | 263 | (TAA)7  | 54-46 |
| BMb746s | PV_GBa0057C04.f | CTGATCAATCAACAGATTAACAT | AGTGTGTTATCCCATTAAAGTT   | 284 | (TA)26  | 53-45 |
| BMb747s | PV_GBa0057E08.r | ACTTTCAAATGTATTGCAGAA   | TTAACTCAGCTCAACATTGC     | 257 | (AAT)5  | 52-44 |
| BMb749s | PV_GBa0057M23.f | TCAGATTGCGCTAAATTCAT    | GTACGCCCTTCCTGACCAT      | 196 | (GA)7   | 53-45 |
| BMb751s | PV_GBa0058B01.r | ATGAAATCCAAATGAGATGG    | AACAATCCACCAATATAGTTCC   | 147 | (AT)14  | 52-44 |
| BMb755s | PV_GBa0060A20.r | CTGACTCAAACCACTCCATT    | TGAATCCAGAGGAAGTGAAG     | 202 | (CT)7   | 56-48 |
| BMb757s | PV_GBa0060M24.r | AAGAATGGTATTGAGTTGTTT   | CATCTCTATGCTTTTCGTTTACA  | 216 | (TA)26  | 52-44 |
| BMb763s | PV_GBa0062J20.r | TCATATTATAAACTTGTTTAGGG | TTGGAGCTAACTGGGAATAA     | 208 | (AT)11  | 50-42 |
| BMb766s | PV_GBa0064J09.f | CAAATAGGTGAAGACCTCAAA   | AACAATGATAGTGGTATGGTAAA  | 148 | (TA)18  | 54-46 |
| BMb768s | PV_GBa0065O21.r | GCTGTTTAAATTGTGCTTCC    | GCATTGTTACCCTTAATCTTG    | 266 | (TTA)12 | 53-45 |
| BMb769s | PV_GBa0066B04.r | AATCACTTGGTCCACAATTT    | GTCAACAAGAGGCAAACAAT     | 260 | (TA)13  | 54-46 |
| BMb771s | PV_GBa0070A04.f | AATTTGGATGTTGAATTTGG    | ACCTTTCAGAAACCGTGTTA     | 256 | (AT)22  | 51-43 |
| BMb772s | PV_GBa0070N02.f | ATGCCACATACAGCATAACA    | TCTAACGGACACCTATCCAC     | 181 | (TA)18  | 56-48 |
| BMb773s | PV_GBa0071B07.f | CCATGATCTTGATCTTATCCTT  | GTTGTCCCATGAGAGAAGA      | 178 | (AT)13  | 54-46 |
| BMb774s | PV_GBa0071O10.f | GGAATGAGCCAATGGTATAA    | TGATTGAAACGAAACACTTCT    | 291 | (TAA)7  | 54-46 |
| BMb775s | PV_GBa0072A03.r | TCAACTGTAAAGAAATCAGATG  | GACTGCGTTAGAACGAACA      | 249 | (AT)15  | 53-45 |
| BMb777s | PV_GBa0074D12.r | TTGAATAGCTTCTAGCCCTG    | AACATGTTTGTCTTCCCTCC     | 231 | (AT)13  | 55-47 |
| BMb779s | PV_GBa0074H15.f | ACGGATACACAACTAGCAA     | AATTTGGTTCTAAAGTTCATTG   | 270 | (AT)15  | 51-43 |
| BMb780s | PV_GBa0074O04.f | GGTAGCAGAGCATATTGGAC    | CGCCTAATAACACAACCTCA     | 284 | (AT)21  | 54-46 |
| BMb781s | PV_GBa0076B02.r | TCCTAGCCGATTTAAGAGTG    | GCTCATTCCTTGTTAATGAAA    | 279 | (AAT)5  | 53-45 |
| BMb782s | PV_GBa0078L23.r | CCCTAAACCCATTCATACAA    | TTAGTCACGAATCTCGACCT     | 285 | (TAA)7  | 54-46 |
| BMb785s | PV_GBa0080J21.r | AATCTTACTTGAACGTCGGA    | CTGCTGCTGCTAGACAATTA     | 243 | (AT)17  | 55-47 |
| BMb787s | PV_GBa0083K06.f | TGTGAATGCTCCTTCTTCTT    | GATGATAAAGGGTTTGTGGA     | 203 | (CTT)6  | 54-46 |

|         |                 |                         |                          |     |         |       |
|---------|-----------------|-------------------------|--------------------------|-----|---------|-------|
| BMb788s | PV_GBa0083M05.f | AAGGGTCTTCTTCTCCAAAC    | CGGAATCCTTTATGTCTCAG     | 265 | (AAG)5  | 54-46 |
| BMb791s | PV_GBa0084C22.r | ACAAGCACCAAAGAAATGAC    | TTTGCAGTAGTGTATCACC      | 292 | (ATA)12 | 55-47 |
| BMb792s | PV_GBa0084J05.r | CATACGAGGTCATCCAAAGT    | GTACGGATACCTTGATGGAA     | 236 | (TA)27  | 55-47 |
| BMb793s | PV_GBa0086J21.f | AGCAACAAGAGAGTCGATGT    | ATTTGTGTTTGCTAAGGAGA     | 173 | (AT)13  | 54-46 |
| BMb794s | PV_GBa0087F20.r | TTGAAGGAAATAACGGAATG    | ATATCTGTTGGGCATGAAAG     | 298 | (AT)11  | 52-44 |
| BMb795s | PV_GBa0087I12.r | TCTGGAAACCTCATTTCTCT    | TTTCCAAATATTTCTACAACCA   | 286 | (TAT)7  | 52-44 |
| BMb797s | PV_GBa0090A04.f | GGGTCATGTTCCCTAGATTGA   | AACTTAAGCCATCAAGTGGGA    | 183 | (TA)21  | 55-47 |
| BMb799s | PV_GBa0090D17.f | TACCCTTCCCTGAGAGGTAT    | TGAATGTGTATTAGTGTGTTGTA  | 219 | (TA)11  | 52-44 |
| BMb800s | PV_GBa0090F19.r | GAGGTTGGTGATGAAGGTAA    | ACAATATCAAACGATAGGCAC    | 212 | (AT)15  | 55-47 |
| BMb802s | PV_GBa0090K17.f | TAACCTAGCCTGATGAAGGA    | AGTGAGAAGCTTTATAAGAGACCC | 222 | (AT)11  | 56-48 |
| BMb803s | PV_GBa0090L08.r | TTCTTAGAATCTCACTAAGCAAA | TCACATGCACAACCTATTTTAC   | 259 | (AT)11  | 54-46 |
| BMb805s | PV_GBa0091B10.f | GACAATGTTCAATCCCAACT    | TTGATCAATCACTCCAAACC     | 241 | (AT)28  | 54-46 |
| BMb806s | PV_GBa0091H12.r | CCCTTAAGCAGTGGTATCAA    | ATTTCCAAGCCAACAAATTA     | 162 | (GAA)5  | 52-44 |
| BMb807s | PV_GBa0091O20.r | GAGACACCCAGATGGAAATA    | CTTATCAAGCAACCACCTTC     | 160 | (AG)6   | 55-47 |
| BMb808s | PV_GBa0093G08.r | TTATCCCAATTATGCCAATC    | AAATGGTCACTATATTGGTCTCT  | 260 | (AAT)13 | 52-44 |
| BMb810s | PV_GBa0095I17.r | AGGCGAGTGAGTTAGTGAGA    | AAACGTTGTACGTCCTCTCGT    | 182 | (GAA)18 | 58-50 |
| BMb811s | PV_GBa0097E09.r | CTCTCTCTCTCGGCAAAGTA    | TTGGTGAATAGACTCTCGTTT    | 105 | (AAT)4  | 55-47 |
| BMb812s | PV_GBa0097G02.f | TGAATAGATTGTTTAGGTTTCAA | AAGTTATTGGAATGTTGTGATTT  | 251 | (TA)8   | 52-44 |
| BMb813s | PV_GBa0097J10.f | GTAGTCTTTGGCTGTTGGAG    | AAATGGCTTATAGCATGGTT     | 211 | (ATA)25 | 54-46 |
| BMb815s | PV_GBa0098B23.f | TGGCATGTGCTAGTTTGATA    | TCGATTACAAGAAATCCACA     | 233 | (AT)11  | 53-45 |
| BMb816s | PV_GBa0098F24.r | CGCATCGATCAAAGATAGTC    | GTCTCTTTCCCAACAAATGA     | 163 | (TA)19  | 54-46 |
| BMb818s | PV_GBa0099F05.r | CAACACTCGTCAATCGTTTA    | CGTAACACAATCTGCCTACA     | 295 | (AT)15  | 55-47 |
| BMb819s | PV_GBa0100D06.r | GACGTAAAGCTTCAGGTGAC    | ACTCATCTGCAACAACAACA     | 247 | (AG)7   | 57-49 |
| BMb820s | PV_GBa0100N12.f | GTTTAGGTAGTGGCTTGGT     | TCTTTGTACTGAGGCAGGTT     | 268 | (TA)30  | 58-50 |
| BMb821s | PV_GBa0101D18.r | ACTGGATCTTGCTACCGTAA    | AGCGATTTCAATTTGTCTCAT    | 233 | (TA)9   | 54-46 |
| BMb823s | PV_GBa0102G21.f | TAACCCTAACCCTAACCCTC    | TTCTGGTGACAATGTTTCAA     | 296 | (CT)20  | 54-46 |
| BMb825s | PV_GBa0103E17.f | CCCATCAATACTTGGCTATC    | TGCACTGTGTGGTCTACTGT     | 284 | (TAA)14 | 54-46 |
| BMb826s | PV_GBa0103G21.r | TTGAATTGGAAAGGAATGAT    | GAAAGTCATACCTCAACCTAAAGA | 187 | (AAT)7  | 51-43 |
| BMb828s | PV_GBa0103N18.f | GTTTACACAGAACTGGGTT     | GAAATGGTCCCAATTCAATA     | 156 | (AG)7   | 52-44 |
| BMb829s | PV_GBa0104F18.f | GGTCCCATAGATAAAGACCA    | CCCAATATGACACGGTAGAT     | 268 | (TAT)5  | 55-47 |
| BMb831s | PV_GBa0104L06.r | AAGCCTCAAAGCACACTTAG    | CAAAGGGTTCTTCACTTGAG     | 253 | (AT)15  | 55-47 |
| BMb832s | PV_GBa0106H21.f | TGTAGATGAAAGCACCAATG    | CTCCAACACATACGAGACG      | 278 | (TAT)6  | 54-46 |
| BMb833s | PV_GBa0107E10.f | ACCGTCAAACATGATTCATAC   | ATGTAGAAGTCGTGCCAAGT     | 296 | (AT)20  | 55-47 |
| BMb834s | PV_GBa0107J07.r | TTGAATAGCTTCTAGCCCTG    | AGGATTTGTTTCCAACAATG     | 275 | (AT)13  | 53-45 |
| BMb835s | PV_GBa0107K07.r | GAGGAGAATTGGAAGGAAGT    | GAGATAGAGTTTGTGCAGCC     | 274 | (GA)11  | 56-48 |

|          |                 |                         |                         |     |         |       |
|----------|-----------------|-------------------------|-------------------------|-----|---------|-------|
| BMb836s  | PV_GBa0108B05.r | TTAAATCTTTGCCTTCTTCG    | CCCAATCGGTAAGTGA        | 194 | (AT)9   | 52-44 |
| BMb838s  | PV_GBa0109P15.f | CTTTCCTAACACCCAAACTG    | AAGAGTGGAGCTGAAACATC    | 211 | (AT)14  | 55-47 |
| BMb840s  | PV_GBa0110A09.r | AAGCAACTTTACTCCCATTG    | GAATTGTGTTCGATCAAACCT   | 192 | (TTA)7  | 55-47 |
| BMb841s  | PV_GBa0110B02.r | CACCAAACACATTGAAGTTG    | AAATGGCTATTCCAGACAGA    | 151 | (TA)15  | 54-46 |
| BMb844s  | PV_GBa0110G11.f | ATTGTTGGTATTATTGAGGG    | TTCGGATCCGTATGTAAAGT    | 279 | (TAT)8  | 51-43 |
| BMb845s  | PV_GBa0110H01.f | TTTGGTTAGACCTTCCTTGA    | CAGATAATTGTGGTGCATTG    | 246 | (AT)13  | 54-46 |
| BMb846s  | PV_GBa0110N05.f | ACCAGACAGCTGGAAGTAAA    | TCCTTATTGGTTCATTCAT     | 202 | (AG)13  | 53-45 |
| BMb847s  | PV_GBa0111C07.r | CCGAAGGTCACAATAGAAAC    | CCAAGTTGACACGACTTTGT    | 266 | (AT)15  | 55-47 |
| BMb848s  | PV_GBa0111E06.f | CTTCTGAAACTGGAAGCAAC    | AACGATAGAACCAAGCTCAG    | 258 | (TCT)8  | 56-48 |
| BMb849s  | PV_GBa0111F10.f | TGGTGGACAAGCTAAAGACT    | TAAGTGAGCAACTGGAGGAT    | 283 | (ATA)9  | 57-49 |
| BMb850s  | PV_GBa0111F24.f | ATCTGCACCAACAAATAAGA    | GGACGAAATTAACCGTGTC     | 245 | (AT)11  | 54-46 |
| BMb851s  | PV_GBa0111J12.r | CCCAGTTTATAAGATGCGAT    | TTGGGTATTCAATCTGAAGG    | 160 | (GA)11  | 54-46 |
| BMb852s  | PV_GBa0111L07.f | TGTCAAACCTGGTTGAACAAA   | CTAGCAAGTCTGCTCGATTT    | 252 | (AT)9   | 54-46 |
| BMb853s  | PV_GBa0111O11.r | TGTCTCACTTCAAATCCAAA    | TTATATGTATCTCTCCATATCCA | 125 | (TA)13  | 52-44 |
| BMb855s  | PV_GBa0112M01.r | AATAAACGGTAGCCTGAACA    | GGTAATGAAATGCGAGGTTA    | 246 | (TA)19  | 54-46 |
| BMb856s  | PV_GBa0113G10.r | ACTAATTCCAAGCTTCACGA    | TTGTGTTTATTTATATTTTCGG  | 180 | (AAT)7  | 49-41 |
| BMb857s  | PV_GBa0113K04.r | ATCCAAATCCCAAATTCTT     | GAACCAAGAGAGAGAGAGCA    | 150 | (TC)16  | 52-44 |
| BMb859s  | PV_GBa0114I24.f | CTTTCCAAACAAGGAAACAG    | TTGCATGAAGCAGAGTAGAA    | 248 | (TCT)8  | 54-46 |
| BMb861s  | PV_GBa0114P23.f | TGGTCCCAATATTCAATTTT    | ACACAACAAACATCAGTCCA    | 288 | (TA)28  | 52-44 |
| BMb862s  | PV_GBa0115B06.f | AACCTCTTTGCTCGTCATAA    | TGAGGCAAGTGTGTCTATG     | 264 | (AT)24  | 56-48 |
| BMb864s  | PV_GBa0118L08.r | TGTTACAGTTTCATGCCTA     | AGAGTACACGTGATTGAACTT   | 225 | (TA)35  | 56-48 |
| BMb865s  | PV_GBa0119B13.r | AAGCCTCAAAGCACACTTAG    | GATCACAAGGGTTCTTCAC     | 258 | (AT)15  | 55-47 |
| BMb866s  | PV_GBa0120G15.f | GGGTTTGTAAGAAATCATGG    | GGCTTCACCTACAGACTTTG    | 212 | (TAT)15 | 53-45 |
| BMb867s  | PV_GBa0121I22.r | TTTGGCAACAAGATACAAGA    | CATAGGACAATTGGGAAGAA    | 218 | (AT)14  | 54-46 |
| BMb868s  | PV_GBa0121M02.f | GGAGTGAGGAGTTAGTTTGC    | CAACTCCTTTGGTGTGTGTTA   | 282 | (TTA)4  | 55-47 |
| BMb871s  | PV_GBa0123M20.f | CAGATGAGCGAGTTATCCTC    | GTGGTGGTGTCTTTTCCTAA    | 223 | (GA)11  | 56-48 |
| BMb872s  | PV_GBa0123N11.f | TTTCTGTATGCAATGAGGTG    | ACAAGTTAATTGCACGACG     | 186 | (TA)11  | 54-46 |
| BMb874s  | PV_GBa0124J07.f | CTGCTTCTTCATTTGCTTCT    | TTGTAATTGATTGTGGCAAG    | 250 | (TA)15  | 53-45 |
| BMb875s  | PV_GBa0125G09.f | TGTTTGATAATGGTGTATTTT   | TTTCTACAGAAGCATGGTAAA   | 233 | (AT)19  | 53-45 |
| BMb1563s | PV_GBa0106P04.r | GGAAGTCTCTAATCTCGTAAG   | AGGTCATTGAGGTGTATATG    | 344 | (AT)5   | 54-44 |
| BMb1564s | PV_GBa0079J05.f | GAGGCTTTTCACGTATCTA     | GTTTAATACACTCCATGCTG    | 202 | (AT)5   | 54-44 |
| BMb1565s | PV_GBa0079P20.r | GTACTGGTTTGGAGAGGTAGTAA | CATCCTTATTAGTGTGTAGCAG  | 251 | (AT)5   | 56-46 |
| BMb1566s | PV_GBa0080C03.r | GTAGTTCATCATTGGCTTAC    | CTAAAACTCCCATGTATGAC    | 180 | (AT)5   | 53-43 |
| BMb1567s | PV_GBa0081P24.r | GTCTTGCTGTAGATGGTTAG    | CTCCAAGTCTCCAATATAGA    | 243 | (AT)5   | 53-43 |
| BMb1568s | PV_GBa0060F12.r | GTAGTTCATCATTGCCTTAC    | GACCATACCTCATTTGTAGA    | 307 | (AT)5   | 53-43 |

|          |                 |                         |                         |     |       |       |
|----------|-----------------|-------------------------|-------------------------|-----|-------|-------|
| BMb1569s | PV_GBa0061I23.r | CACATCTTCACTAATCACC     | GTTGTCTCAATAGCTTCTCT    | 138 | (AT)5 | 53-43 |
| BMb1570s | PV_GBa0070H06.f | GTCTATGTGAGGAGATATGAGA  | ATCTCTCTCTGTTGGATCTG    | 372 | (AT)5 | 55-45 |
| BMb1571s | PV_GBa0070D08.r | ATAGCTGCTGTGATGCTT      | AACACCGTCTAGAGATATGAC   | 134 | (AT)5 | 56-46 |
| BMb1572s | PV_GBa0074O05.r | GCACTCCTTCAGAATAATG     | GTGTCTGTATAAGGGTTGAA    | 363 | (AT)5 | 53-43 |
| BMb1573s | PV_GBa0073O14.r | AGAGGGAAATTGTTCTCTAC    | GACAGTACGGTTATTCTAACAC  | 257 | (AT)5 | 54-44 |
| BMb1574s | PV_GBa0047M20.r | CTTGACACTGAAGAATTAGG    | GTCATGTGACCAGAACTAT     | 257 | (AT)5 | 53-43 |
| BMb1575s | PV_GBa0056G20.f | TACTACTCTACCTCTTAATGCAC | CTGTACCACTATAATCACAGC   | 384 | (AT)5 | 55-45 |
| BMb1576s | PV_GBa0058H22.f | GGTAGCTCATCTTGTGTATATG  | GGGATGTCACTTATCCTTTA    | 339 | (AT)5 | 54-44 |
| BMb1577s | PV_GBa0057M23.r | ACTTGTAGGAACACACTCTCT   | CTGCTATATTACTCTCACCCCTA | 123 | (AT)5 | 55-45 |
| BMb1578s | PV_GBa0044J16.f | GAACATATACGTGTGAGGAT    | CCACTAATACGGCTAATACA    | 358 | (AT)5 | 54-44 |
| BMb1579s | PV_GBa0043F19.f | GATGTAGTTCTTGGTGTAAAGAG | CCAAACTATCTTCTGCAAC     | 366 | (AT)5 | 54-44 |
| BMb1580s | PV_GBa0043J22.r | GTAGATCAAAGAGTACAGATCG  | TTACCATGAAGTGGTAGATG    | 237 | (AT)5 | 54-44 |
| BMb1581s | PV_GBa0033H22.f | CTGCTATAGACACTCATCTATC  | GAGGGTCAAAGAGTACTGA     | 236 | (AT)5 | 54-44 |
| BMb1582s | PV_GBa0033H22.f | GTACTCTTTGACCCTCATC     | CTAGAGTAGTGATAGACATTGG  | 341 | (AT)5 | 54-44 |
| BMb1583s | PV_GBa0026K04.r | CAACCACAAGAAGGTATTC     | GTCTACCCTACAAGGATCTAA   | 389 | (AT)5 | 53-43 |
| BMb1584s | PV_GBa0035L09.r | TATTGCTGATTGCTCAAGG     | AGTATGGTGGTTATCTTAGCAG  | 247 | (AT)5 | 55-45 |
| BMb1585s | PV_GBa0028I09.f | TTAACCAAAGGACTACCAC     | GATCAGGTAAGATGTAATGG    | 393 | (AT)5 | 52-42 |
| BMb1586s | PV_GBa0023O02.r | CTCTTCCCTCTTGTTTACTT    | CCCTCATGTCTTCTTTTC      | 324 | (AT)5 | 53-43 |
| BMb1587s | PV_GBa0014C13.f | TACTACTCTACCTCTTAATGCAC | CACTATAATCACAGCCTTTC    | 378 | (AT)5 | 53-43 |
| BMb1588s | PV_GBa0008P12.r | TATTGCTGATTGCTCAAGG     | AGTATGGTGGTTATCTTAGCAG  | 247 | (AT)5 | 55-45 |
| BMb1589s | PV_GBa0018B08.r | GGAAGGTATTAATGTGTGG     | CTGAGATAATAACCCACAAG    | 247 | (AT)5 | 53-43 |
| BMb1590s | PV_GBa0020N21.r | GCTAGTTCATTGAGTTTCTG    | CTCCAAAGACAAACTAGAAG    | 241 | (AT)5 | 53-43 |
| BMb1591s | PV_GBa0020D13.r | AACTCAAAGGAGAGATGAC     | CTGGAACCTGTAATTGTAAG    | 256 | (AT)5 | 53-43 |
| BMb1592s | PV_GBa0005G23.f | CACACATGAGAACTTAGACTC   | GATAGTTGTAGTTGTAGACGTG  | 167 | (AT)5 | 55-45 |
| BMb1593s | PV_GBa0008L10.f | TGTTTCTCCCTTAGAAAGAG    | CTGCTATATTACTCTCACCCCTA | 151 | (AT)5 | 54-44 |
| BMb1594s | PV_GBa0063D03.f | AGAGTTTCAACAGTGACATC    | AATACTTTGGCTCTGTGC      | 390 | (AT)6 | 55-45 |
| BMb1595s | PV_GBa0067O16.r | CCACCTACCTAAATATGGTACT  | GATAAACTCTGCACTCTCTTC   | 308 | (AT)6 | 55-45 |
| BMb1596s | PV_GBa0057A19.f | GTTGATGCTACTTAGTGTACC   | TAGGTTATCTCCTTGTAGAGAC  | 381 | (AT)6 | 55-45 |
| BMb1597s | PV_GBa0049B22.r | GAGGGCTTCTAGTGTAATAAT   | CCTCAACATACAACCTTGC     | 368 | (AT)6 | 53-43 |
| BMb1598s | PV_GBa0058E04.r | GTGAGAGTGTGAAACCTTTA    | GTTAGCATACCACAAGGTAG    | 279 | (AT)6 | 55-45 |
| BMb1599s | PV_GBa0027K19.r | GCTCATATAGCTTGTATGC     | ACATAGATGAGAGATGAGAGAC  | 384 | (AT)6 | 54-44 |
| BMb1600s | PV_GBa0018B08.r | CTTGTGGGTTATTATCTCAG    | CAAACAACCTCAAGGTCTAAG   | 344 | (AT)6 | 53-43 |
| BMb1601s | PV_GBa0112K06.r | AACACGAGAACCCAAAAC      | ACCCTAATCTCTCTCAAAGTC   | 318 | (AT)7 | 55-45 |
| BMb1602s | PV_GBa0080O18.f | GCTGCTAGCTAAGTTATGTATG  | GGCTGTGTATATAGCGTTAAG   | 233 | (AT)7 | 56-46 |
| BMb1603s | PV_GBa0101D18.r | ATCATACTGGATCTTGCTAC    | CTCTTATACTTCGACACTTCTC  | 331 | (AT)8 | 54-44 |

|          |                 |                        |                        |     |        |       |
|----------|-----------------|------------------------|------------------------|-----|--------|-------|
| BMb1604s | PV_GBa0081G22.f | ATAGTGATGCCTAACATGAG   | GCTCTTAGACTTATGCTGAA   | 379 | (AT)8  | 54-44 |
| BMb1605s | PV_GBa0059C01.r | CTACCACTACTTCCTAATTCC  | CACCAAACATACATCCAAGT   | 316 | (AT)8  | 54-44 |
| BMb1606s | PV_GBa0057L03.f | GTCTACCTTAAAGTGTGTAAGC | GACTATGGTGTTCATGTC     | 370 | (AT)8  | 54-44 |
| BMb1607s | PV_GBa0056A16.f | GACACTTTGCAAGAGAAGA    | CCTAAGAAAGAATGTCACAC   | 292 | (AT)8  | 53-43 |
| BMb1608s | PV_GBa0036J19.f | GTAAAAGTGGTCTTACTCCTTC | GCATAGAATATGTCCTCAGA   | 382 | (AT)8  | 54-44 |
| BMb1609s | PV_GBa0038I08.f | CTATAGAGGTTGTTTTGGTG   | CAATAAAGAGTACCTGAGTACC | 328 | (AT)8  | 53-43 |
| BMb1610s | PV_GBa0067P24.f | AGGTGTACGGAGTTATTTG    | CTCTTCGTTTAGGTCACAT    | 371 | (AT)9  | 54-44 |
| BMb1611s | PV_GBa0054K11.r | GCTGATGATATGTCTTGTCT   | GTAGTGAGACCCTTACCACT   | 396 | (AT)9  | 54-44 |
| BMb1612s | PV_GBa0003H02.f | GTTAACTCCCAATAGTGATG   | CTATAGAATCTTGGTCCGTA   | 400 | (AT)9  | 53-43 |
| BMb1613s | PV_GBa0118B14.f | GTTTATGCTCCAATGCAC     | GGGACAGAAAGTGAAAGA     | 366 | (TA)10 | 54-44 |
| BMb1614s | PV_GBa0041N17.r | GGGTTTGGTAAATAAGAGTC   | GGGTACACGTGAAAGTAAAT   | 232 | (TA)10 | 53-43 |
| BMb1615s | PV_GBa0104G14.r | GAACGTGTCACTGATTTTAC   | CTTAGTCTCAAAGTGAAGC    | 380 | (TA)11 | 54-44 |
| BMb1616s | PV_GBa0101D24.f | CAGCCTTACTCTACTAATCC   | TTTCGGTCTCTATTTCTCTC   | 384 | (TA)11 | 54-44 |
| BMb1617s | PV_GBa0080J21.r | CCATTCTAAAACACCTTTCC   | ATATTCCTTGAGTGTGATGG   | 159 | (TA)12 | 54-44 |
| BMb1618s | PV_GBa0080P15.r | GGCTGAAAAGAATCTACTAC   | GTTCAACTTGTGGATTAGAC   | 257 | (TA)12 | 53-43 |
| BMb1619s | PV_GBa0005G01.r | CTACAGTCCTATTGCGTTAC   | AATGGGGACTCTAAGTTATC   | 150 | (TA)12 | 54-44 |
| BMb1620s | PV_GBa0108K17.r | CAGTTGTTCTTCTAGTTACCC  | CTTCTCATCACCTTCAAAC    | 289 | (TA)14 | 53-43 |
| BMb1621s | PV_GBa0052A10.f | TCCAACCTATCACTATTCAC   | TAGTTGGTAGTATTGGGGTA   | 325 | (TA)14 | 54-44 |
| BMb1622s | PV_GBa0009N16.r | GTTTACACATAGAGACACACG  | GAACCTAAAGAGTAGAAGATGC | 396 | (TA)15 | 56-46 |
| BMb1623s | PV_GBa0016A15.f | CACCATTATGAACAGTCAAC   | TCTATCTCTCTTGCGTTCT    | 396 | (TA)15 | 54-44 |
| BMb1624s | PV_GBa0076C06.r | GGTACTGAGCATACCAAG     | CGAGGACAATTCCTTTTAC    | 370 | (TA)16 | 53-43 |
| BMb1625s | PV_GBa0117P10.r | CTCTTTTCAATGCTTCTCAC   | AAGCAATCTAAGGTGTGG     | 383 | (TA)5  | 54-44 |
| BMb1626s | PV_GBa0118M22.r | TACGGGGAATTCTAAAAGC    | GTGTCTACCAATTTACCATAG  | 344 | (TA)5  | 55-45 |
| BMb1627s | PV_GBa0111B07.f | GTTCTCCTAAACTGTTCTCC   | CTAGACCAAAGCCAAAG      | 359 | (TA)5  | 53-43 |
| BMb1628s | PV_GBa0094I16.r | ATTGTGTCTGGCTGTTGT     | ATAATTGTTTCGGACACAGG   | 367 | (TA)5  | 55-45 |
| BMb1629s | PV_GBa0102D23.f | GTAGTCCCAGACTGAAAAC    | GTTCTACCTCCTTTCTCAAT   | 338 | (TA)5  | 54-44 |
| BMb1630s | PV_GBa0104E10.f | GGTATGTTAACCTCTGTTTCAG | GTAGGGCTCATGTTTATTTT   | 235 | (TA)5  | 54-44 |
| BMb1631s | PV_GBa0103B19.r | GGGTGTTTACATACTAATG    | AAGTAGTCTAACAGTCCTTCAG | 400 | (TA)5  | 53-43 |
| BMb1632s | PV_GBa0104H24.r | TCCTGCCTCTACTGTTTTA    | GGAGATCTTCTTCTAATGT    | 203 | (TA)5  | 54-44 |
| BMb1633s | PV_GBa0091L02.r | GAATCTTGATGTAGTGGTGA   | TATATCTAGTCCCTCCAAAGAC | 345 | (TA)5  | 54-44 |
| BMb1634s | PV_GBa0079J12.r | TAGGAAGAAAGTGTGTTGTC   | GTTCTTCTTTGTAATACCC    | 256 | (TA)5  | 53-43 |
| BMb1635s | PV_GBa0090N05.r | GGGAATATCAAAGATAGAGG   | CAACTTCCACACATTTCC     | 348 | (TA)5  | 52-42 |
| BMb1636s | PV_GBa0092M04.r | GAACCTGGTAACTAGAGTGTTT | TAAGTCCAGTGGTACAGTAGAT | 272 | (TA)5  | 56-46 |
| BMb1637s | PV_GBa0089K09.f | AGTGAGTTGTACATGGAGTAAG | GGAACATGTCACCTAAAGG    | 150 | (TA)5  | 53-43 |
| BMb1638s | PV_GBa0080C12.r | GGCTTTTCAATCTCAATGTC   | TACACGGCTCTTAAAAGGTA   | 181 | (TA)5  | 55-45 |

|          |                 |                        |                        |     |       |       |
|----------|-----------------|------------------------|------------------------|-----|-------|-------|
| BMb1639s | PV_GBa0080J12.f | CTATGCCCATCTCTATGTAA   | TTGTCACTATGTACTACTGCTG | 295 | (TA)5 | 53-43 |
| BMb1640s | PV_GBa0068B18.f | GTAGCAGCAAGAGACTCAG    | GTTGTTGTAGACTGAAAGTAGG | 280 | (TA)5 | 56-46 |
| BMb1641s | PV_GBa0058O05.r | CTAAATGTGATTAGCTGCTG   | AGGGACTAAAGTTAATACGG   | 347 | (TA)5 | 54-44 |
| BMb1642s | PV_GBa0058J04.f | GTGATTCAACTCTCAACACT   | CTCTTCCTTTACTTCTTCCT   | 268 | (TA)5 | 54-44 |
| BMb1643s | PV_GBa0066L18.f | ATAACGAGGTGGTCTAGATT   | GGAGTTTTTCAGAATTAGGAG  | 378 | (TA)5 | 53-43 |
| BMb1644s | PV_GBa0060I15.f | AGTATGGTCTTACGCAATAG   | TACATGAGGGTATGTTTAGG   | 198 | (TA)5 | 54-44 |
| BMb1645s | PV_GBa0061L13.r | CAAGTTCATTGACCCAAC     | GTTGTATCTGACGACACAGT   | 147 | (TA)5 | 54-44 |
| BMb1646s | PV_GBa0055J17.f | CACACGTCTACTAAACTATGC  | CTGAATTGGATGTAGGAAAC   | 290 | (TA)5 | 53-43 |
| BMb1647s | PV_GBa0057D21.f | CTCCAGATGTAGGAAATATG   | GAATCTCCTCTTCTAGTTACTG | 223 | (TA)5 | 52-42 |
| BMb1648s | PV_GBa0053B04.f | GTTAATGCATCATACCTGAG   | GGAGATCTTCTTCTAATGT    | 341 | (TA)5 | 53-43 |
| BMb1649s | PV_GBa0048N22.r | CGGAATACGGTTCCTACTTA   | TACTAGCTGTCCACGTTAT    | 306 | (TA)5 | 53-43 |
| BMb1650s | PV_GBa0047A04.r | GTTAAGAAGATCCGAGAAGT   | GTTTGACTAAGGCACTCTTT   | 229 | (TA)5 | 54-44 |
| BMb1651s | PV_GBa0029P21.f | CCTCCTGTTTTCTCTTTAGT   | TACTTCCTCACTGTTCACTA   | 314 | (TA)5 | 54-44 |
| BMb1652s | PV_GBa0032C17.f | GTCAGTAAGATTAAGACACTCG | GTAGGACAAATAGATGTGTAGG | 397 | (TA)5 | 55-45 |
| BMb1653s | PV_GBa0039O07.r | ACTTAGCATGAAGTTGGTG    | TAGATTTGTGTCCCTATGTC   | 226 | (TA)5 | 54-44 |
| BMb1654s | PV_GBa0027B14.f | AGCTTAGACTTTTGAAGGAC   | AAAGCTAGAGAACTTCCAG    | 345 | (TA)5 | 55-45 |
| BMb1655s | PV_GBa0035H03.r | GTGTTGAAATGATGCTGTC    | TACCTCAAAGAGGCTAACT    | 219 | (TA)5 | 54-44 |
| BMb1656s | PV_GBa0028C02.r | CAGACCTAACACTCAAATTC   | TAGTATCATGGTTGACTTGC   | 258 | (TA)5 | 53-43 |
| BMb1657s | PV_GBa0039O22.r | ACTGCTGGTAAAGTATTGTG   | AGAGTGCTAGATAGGGAAAT   | 375 | (TA)5 | 55-45 |
| BMb1658s | PV_GBa0014O15.r | GGTACCTGGTCTTCAATTA    | GGAATTGGATCTCGTACT     | 239 | (TA)5 | 53-43 |
| BMb1659s | PV_GBa0020M05.r | TACGGGGAATTCTAAAAGC    | GTGTCTACCAATTTACCATAG  | 342 | (TA)5 | 55-45 |
| BMb1660s | PV_GBa0018O18.r | TGAGAGCTACTAACAATGAC   | CTTGCATATTGTACCAGAG    | 346 | (TA)5 | 53-43 |
| BMb1661s | PV_GBa0018A21.r | GAAAGAAGAGTTGTTAGTGC   | ATAGTGCAAACCTGTCTC     | 309 | (TA)5 | 54-44 |
| BMb1662s | PV_GBa0017L10.f | GGTACGATGTTAAGTATGTCC  | CTTGICTTCTCTTTGTTTAC   | 219 | (TA)5 | 54-44 |
| BMb1663s | PV_GBa0017N08.f | GACATTGGTACAATTGAGG    | CAGTGTGAAGGTTCTAAAAG   | 314 | (TA)5 | 53-43 |
| BMb1664s | PV_GBa0007B23.r | GTTGAGTTACGTGCTTACTT   | ATAGGACAGAGGTCTTCTAAAC | 370 | (TA)5 | 55-45 |
| BMb1665s | PV_GBa0007N10.f | ACTTCGCAGTGTGATGAA     | ACCTCTTCATTGTCTTTGTC   | 391 | (TA)5 | 55-45 |
| BMb1666s | PV_GBa0112G14.r | GATGAGTGTCTCCACTTTTA   | CTCTTTCTTAATGACCACTC   | 338 | (TA)6 | 53-43 |
| BMb1667s | PV_GBa0096I16.r | ATGTTATTGACCCTACACAC   | GTTAGATACACAGGTCAGGA   | 324 | (TA)6 | 55-45 |
| BMb1668s | PV_GBa0090B16.f | GAGTGATTCCTATCTCTGTTAG | TGCTTGTAGCTGGATAGTTA   | 259 | (TA)6 | 55-45 |
| BMb1669s | PV_GBa0037D07.r | CTACAAGACATAAAGCATCC   | GGTGAGAGAATTGAATGAG    | 393 | (TA)6 | 53-43 |
| BMb1670s | PV_GBa0023G21.r | CTACAAATTGAGCACATCTC   | CATTAGCTATGGCATGTTG    | 322 | (TA)6 | 54-44 |
| BMb1671s | PV_GBa0118F08.r | CTACTTGCTGAGTACACAAAC  | GAGTATATATGCCACTCTGAAC | 385 | (TA)7 | 55-45 |
| BMb1672s | PV_GBa0119L15.r | TACTTTAGGTTGGTGTGAAC   | ACCTACAAAGGTAGAGTTAGTG | 221 | (TA)7 | 55-45 |
| BMb1673s | PV_GBa0090L22.r | CTGAGGAATCAGTGTTTAAG   | TATATGAACATGGAGAGTGG   | 285 | (TA)7 | 53-43 |



|          |                 |                        |                        |     |        |       |
|----------|-----------------|------------------------|------------------------|-----|--------|-------|
| BMb1674s | PV_GBa0062A16.r | GTGTGTTAATGCACTGTTCT   | GCTGAGACGAACTAGTATTAAG | 373 | (TA)7  | 55-45 |
| BMb1675s | PV_GBa0060L01.r | TACTTTAGGTTGGTGTGAAC   | ACCTACAAAGGTAGAGTTAGTG | 222 | (TA)7  | 55-45 |
| BMb1676s | PV_GBa0028B22.f | GGACTCGACTAATTTGAACT   | AGATTTAGGATGCTGGAG     | 321 | (TA)7  | 53-43 |
| BMb1677s | PV_GBa0008F05.r | ATCTACGTGCACTTTCTTC    | GACTTGTTATCACGTTTGG    | 307 | (TA)7  | 54-44 |
| BMb1678s | PV_GBa0112M13.f | GAGCCTGAAAGACAAAGTA    | CCTAGGTAGTTTCCTGTAAATC | 345 | (TA)8  | 54-44 |
| BMb1679s | PV_GBa0108A12.r | AGGTTTTGGTCTATCCTAGT   | AGTACATGTCTCAATCCTCTC  | 334 | (TA)8  | 55-45 |
| BMb1680s | PV_GBa0105D16.f | CTAGGTGTTCAACAAGTTACTG | GCTAAACTCTAGGAAAGAGAG  | 275 | (TA)8  | 55-45 |
| BMb1681s | PV_GBa0086I09.r | GAAGTACTCATTCTTAC      | CTCTATTACTAACTGCACCAC  | 279 | (TA)8  | 53-43 |
| BMb1682s | PV_GBa0106D12.f | GATTTCTCCCAAAGTACT     | AAGAGACTTACACCAAACCT   | 176 | (TA)9  | 54-44 |
| BMb1683s | PV_GBa0091G14.r | GTGTGTCTCCTTCAACTTC    | GAGATTGACATCTATTCGAC   | 325 | (AAT)4 | 53-43 |
| BMb1684s | PV_GBa0090N05.r | GTAAAGTGCTAGAAGTGGAA   | CTTTGATATTCCCAGTCC     | 305 | (AAT)4 | 52-42 |
| BMb1685s | PV_GBa0080K20.f | GTTTTGACACCACTGATCTA   | GAAATGTGTTACTGGATACC   | 236 | (AAT)4 | 53-43 |
| BMb1686s | PV_GBa0048F09.r | CAACTACTTCTAAAACGACACC | CCCATTCAAAGTTACGAAG    | 275 | (AAT)4 | 54-44 |
| BMb1687s | PV_GBa0052D16.f | ACGAAGAAGGAGAAGTTAGT   | AGATTGTAGTCTTCGGTTTC   | 392 | (AAT)4 | 55-45 |
| BMb1688s | PV_GBa0020G23.r | GATCTAGACTGTAGGGTTTGT  | CAAGTCTACGCTAGAATCAT   | 282 | (AAT)4 | 54-44 |
| BMb1689s | PV_GBa0110G11.f | GTATTATTGAGGGGTGGA     | CTATCACATGACCACTACAAG  | 378 | (AAT)5 | 53-43 |
| BMb1690s | PV_GBa0080E19.f | ATAACATCTACCTGACACGA   | GTTAGAAACCATAGTCTACACG | 399 | (AAT)5 | 55-45 |
| BMb1691s | PV_GBa0053G21.f | AACAGTTTGGTAGACGAAG    | GTCAGAACTTAGCTGAATAGAG | 323 | (AAT)5 | 55-45 |
| BMb1692s | PV_GBa0024D11.f | CTAAGGAAAATCACCATGAC   | GGTTATCACGTTAGTCTTACAC | 250 | (AAT)6 | 53-43 |
| BMb1693s | PV_GBa0096A16.r | CCTATATTGCATCTGATTGG   | CTAGTGATGAAGTTTCTCTCCT | 254 | (ATA)4 | 53-43 |
| BMb1694s | PV_GBa0088H20.f | GCAGACTCACAGACCTAAA    | GTTTTACATATCTCTGCTG    | 213 | (ATA)4 | 54-44 |
| BMb1695s | PV_GBa0026O07.r | ATAGGAGAAGGACTAATGGA   | GCCCTACACTTATCAATTC    | 352 | (ATA)4 | 53-43 |
| BMb1696s | PV_GBa0032D07.f | CCTATATTGCATCTGATTGG   | CTAGTGATGAAGTTTCTCTCCT | 254 | (ATA)4 | 53-43 |
| BMb1697s | PV_GBa0116O02.f | CCTCATTAGGTAGAAGAACTGA | GAAGGCCAACAGAAACAA     | 294 | (ATA)5 | 55-45 |
| BMb1698s | PV_GBa0119M24.f | GACTACTTACTTGTGCTAGACC | GCGTTCTAGTGTCTGTGTAT   | 285 | (ATA)5 | 57-47 |
| BMb1699s | PV_GBa0086K15.r | TATCAGAGAATCTGCCTAGA   | GACTGTATTTTCTTGGGTCT   | 393 | (ATA)5 | 54-44 |
| BMb1700s | PV_GBa0028C14.f | GTGCACAAGTATGTTTCTGT   | CATATATCAGACACTGACACTC | 252 | (ATA)5 | 55-45 |
| BMb1701s | PV_GBa0118H01.f | ACGTATCTTCTTGTGTTAGC   | GAAGTGCACCACATATACTT   | 335 | (ATT)4 | 55-45 |
| BMb1702s | PV_GBa0086C06.r | TATCTATTAGGGGACTTTCC   | CACAAGGCTAACTAAGTAGAAC | 161 | (ATT)4 | 53-43 |
| BMb1703s | PV_GBa0055L01.r | GTGTAACATCCCAAAGTACT   | GTTTGAGAGAGATAGGTTCTG  | 360 | (ATT)4 | 53-43 |
| BMb1704s | PV_GBa0055D05.r | CACTGACGTAAATTGTGTG    | ATATGGAGTTAGGATTACCC   | 285 | (ATT)4 | 53-43 |
| BMb1705s | PV_GBa0028C17.r | CTATGTCACTTAAGATCTCAGC | TTGGTATCTCTCTAGAATGG   | 193 | (ATT)4 | 53-43 |
| BMb1706s | PV_GBa0014M05.r | ATATCTGCAGTGTGATTAGC   | CTTCTACCCACACAATAC     | 349 | (ATT)4 | 55-45 |
| BMb1707s | PV_GBa0022D21.r | TACCTCTTCTTCTTCTTCTT   | CACAAGGCTAACTAAGTAGAAC | 318 | (ATT)4 | 55-45 |
| BMb1708s | PV_GBa0022D24.f | TCTACCTCTTCTTCTTCTTCT  | AAGAGTATGTTGACATGGAG   | 355 | (ATT)4 | 54-44 |

|          |                 |                        |                         |     |        |       |
|----------|-----------------|------------------------|-------------------------|-----|--------|-------|
| BMb1709s | PV_GBa0083D24.r | GACTTTGAAGGAACTGCT     | GTCATACCTAACTCGCAATA    | 398 | (ATT)5 | 54-44 |
| BMb1710s | PV_GBa0091D17.r | GACTCATCTTCTTGGATTCT   | GGACTAGGAATGTGAGTAAA    | 381 | (ATT)5 | 54-44 |
| BMb1711s | PV_GBa0028C17.r | AGAACCATTCTAGAGAGATACC | CTACTGAAGGTTTCGCTAATA   | 349 | (ATT)5 | 54-44 |
| BMb1712s | PV_GBa0004F22.r | TCTTCTTGGACTTGTGTTC    | AGATAGGGAACCAATGTATC    | 396 | (ATT)5 | 54-44 |
| BMb1713s | PV_GBa0103A07.f | GTGATGTTCTCTACCAGAAA   | CAGCACTGATTCTTCTTG      | 388 | (TAA)4 | 53-43 |
| BMb1714s | PV_GBa0080P15.f | CTTCTACTTACCACACCCTAT  | GTGAGGTGAGCTTAATTTG     | 182 | (TAA)4 | 54-44 |
| BMb1715s | PV_GBa0027D12.r | GGATGTTAGTGATGGATAGA   | GTTGTAAGGAAGGAGGAGT     | 334 | (TAA)4 | 53-43 |
| BMb1716s | PV_GBa0039G01.f | CTTCTACTTACCACACCCTAT  | CTACCAAACAAGTGACAGAT    | 360 | (TAA)4 | 55-45 |
| BMb1717s | PV_GBa0013O17.f | GGACTAAATAGTGTGAGCTAAG | AGCTCAATAGTTCACGTTT     | 328 | (TAA)5 | 55-45 |
| BMb1718s | PV_GBa0017O22.r | CCAGTGAGTCAAAGACAATA   | AGTTGTGCATAGCAAGTAAC    | 230 | (TAA)6 | 54-44 |
| BMb1719s | PV_GBa0056H13.f | GTGGAGAGTAAATTGAAAGC   | GCACTAAAAGTATCCTTGG     | 213 | (TAA)7 | 53-43 |
| BMb1720s | PV_GBa0094I16.r | GTGTCTGGCTGTTGTTCT     | ATAATTGTTCCGGACACAGG    | 364 | (TAT)4 | 55-45 |
| BMb1721s | PV_GBa0109A18.r | CACATAGGGTAACGATACAT   | TGTCTAGCCTTTCTTACTTG    | 358 | (TAT)4 | 54-44 |
| BMb1722s | PV_GBa0085F16.r | CCACCTTTTCTGGTATAACAT  | GGAGGATTGAGTCTTAGTAAC   | 377 | (TAT)4 | 54-44 |
| BMb1723s | PV_GBa0045C22.r | ACTATAACCCATCATCACAC   | GGACTGATCTAATGAAAGAG    | 204 | (TAT)4 | 52-42 |
| BMb1724s | PV_GBa0055D10.r | CAGAGTAGGACAACCTTTG    | GTTGTTTACTGCTTCACTTC    | 110 | (TAT)4 | 54-44 |
| BMb1725s | PV_GBa0013A15.f | TACCAATATGTTCCGGAGAG   | CAACCTTAATCAGTGTTAGC    | 376 | (TAT)4 | 53-43 |
| BMb1726s | PV_GBa0015O20.f | GAGTGTCTCTTACTATCATTGG | CCTCTCTCTACAACCTTCAGTA  | 209 | (TAT)4 | 55-45 |
| BMb1727s | PV_GBa0010O08.r | TACTGATTGGATGTCTAAGG   | CACAGTTATCACTTTAGAGGAC  | 106 | (TAT)4 | 54-44 |
| BMb1728s | PV_GBa0087I12.r | GTACCCCAAGTACTCCTATT   | CAACCACTAGGTAAAATGG     | 221 | (TAT)6 | 53-43 |
| BMb1729s | PV_GBa0058G08.f | CTATGTAGAGTTTGTGAAGCAG | AGATACATGGAAAGCACAC     | 351 | (TAT)6 | 55-45 |
| BMb1730s | PV_GBa0107M20.f | CCTGCACTGAGATTTAATAG   | CGGTCAGTTCTGAGATAAC     | 258 | (TAT)7 | 53-43 |
| BMb1731s | PV_GBa0086N01.r | GGTATGGTGAAATTGTTGG    | GAGACTGATAATTGGGTAGAGT  | 325 | (TTA)4 | 54-44 |
| BMb1732s | PV_GBa0048C09.f | TGCTTCTCTCAGTATGATTC   | CTTCAAGTAAACCACACAGT    | 319 | (TTA)4 | 54-44 |
| BMb1733s | PV_GBa0042E13.f | CTGCAGTTACGTTAGAGTTT   | ATACAGTCATATCCAGGTCTAC  | 366 | (TTA)4 | 55-45 |
| BMb1734s | PV_GBa0048L21.r | AGACAGCCCAAACCTCTATAA  | CACGCCTGATAATGAATG      | 245 | (TTA)4 | 53-43 |
| BMb1735s | PV_GBa0030M22.f | GGGGTTACAAACGAATTAC    | GTA AAAAGTGGAGAGGAGACTA | 273 | (TTA)4 | 54-44 |
| BMb1736s | PV_GBa0015L17.f | CAACTTCATAGCCAGTATGT   | TACTAACACGCCTGTAAACT    | 260 | (TTA)4 | 55-45 |
| BMb1737s | PV_GBa0002E09.r | AAGTCAACCGACAAGAAC     | CGATGACTATACCCTAACAA    | 130 | (TTA)4 | 54-44 |
| BMb1738s | PV_GBa0104B24.f | ACAAAACATCTCTCCCTCT    | CAAGGTTGTCAGATTAACAC    | 226 | (TTA)5 | 54-44 |
| BMb1739s | PV_GBa0046L23.f | CACTACACCAAACAAATTCC   | TGATATCTCCATTACACACG    | 348 | (TTA)5 | 54-44 |
| BMb1740s | PV_GBa0044J11.f | CTGACTTATTTTGCTGCTG    | CTGGGAATGGAAAATAGG      | 184 | (TTA)5 | 52-42 |
| BMb1741s | PV_GBa0040E03.f | GATGTGATGGGTGTGATA     | TCTTGAGTGCTCTACACTTT    | 400 | (TTA)5 | 54-44 |
| BMb1742s | PV_GBa0003O07.f | GTGTTCTTACAATGTTCTCA   | CCCAGAAGATAAACTATCA     | 278 | (TTA)7 | 54-44 |
