# Supplementary material for: BAC-End Microsatellites from Intra and Inter-Genic Regions of the Common Bean Genome and Their Correlation with Cytogenetic Features
Source: PubMed Central journal article supplement (PMC4177843; doi:10.1371/journal.pone.0101873), 2014-09-25
Supplement: pone.0101873.s002.pdf [file pone.0101873.s002.pdf]

| <b>LG</b> | <b>SSR</b> | <b>Contig</b> | <b>Contig size Kb</b> | <b>Comments</b>   | <b>Distance</b> |
|-----------|------------|---------------|-----------------------|-------------------|-----------------|
| b01h      | BMb644s    | 0             | NA                    | Singleton derived | 0.0             |
|           | BMb1027    | 72            | 94                    | Contig derived    | 21.4            |
|           | BMb256     | 294           | 88                    | Contig derived    | 25.2            |
|           | BMb405     | 873           | 126                   | Contig derived    | 20.3            |
|           | BMb1079    | 349           | 142                   | Contig derived    | 10.9            |
|           | BMb1067    | 248           | 94                    | Contig derived    | 13.0            |
|           | BMb716s    | 0             | NA                    | Singleton derived | 17.6            |
|           | BMb744s    | 0             | NA                    | Singleton derived | 3.5             |
|           | BMb194     | 205           | 124                   | Contig derived    | 10.8            |
|           | BMb83      | 77            | 116                   | Contig derived    | 2.6             |
|           | BMb859s    | 0             | NA                    | Singleton derived | 2.6             |
|           | BMb1287    | 1198          | 112                   | Contig derived    | 1.9             |
|           | BMb1733s   | 0             | NA                    | Singleton derived | 0.0             |
|           | BMb1200    | 2373          | 79                    | Contig derived    | 8.3             |
|           | BMb513     | 1690          | 114                   | Contig derived    | 4.2             |
|           | BMb1189    | 2175          | 107                   | Contig derived    | 2.5             |
|           | BMb502     | 1626          | 103                   | Contig derived    | 4.5             |
|           | BMb290     | 384           | 96                    | Contig derived    | 0.7             |
|           | BMb213     | 225           | 78                    | Contig derived    | 20.6            |
|           | BMb670s    | 0             | NA                    | Singleton derived | 5.4             |
|           | BMb1162    | 1542          | 75                    | Contig derived    | 5.1             |
|           | BMb1089    | 382           | 110                   | Contig derived    | 4.3             |
|           | BMb1681s   | 0             | NA                    | Singleton derived | 21.0            |
|           | BMb1263    | 633           | 118                   | Contig derived    | 6.6             |
|           | BMb1675s   | 0             | NA                    | Singleton derived | 2.9             |
|           | BMb1672s   | 0             | NA                    | Singleton derived | 0.6             |
|           | BMb64      | 49            | 82                    | Contig derived    | 4.8             |
|           | BMb1631s   | 0             | NA                    | Singleton derived | 17.6            |
|           | BMb1230    | 83            | 124                   | Contig derived    | 3.1             |
|           | BMb1191    | 2255          | 74                    | Contig derived    | 3.8             |
|           | BMb1024    | 70            | 101                   | Contig derived    | 0.6             |
|           | BMb1125    | 704           | 101                   | Contig derived    | 5.1             |
|           | BMb1725s   | 0             | NA                    | Singleton derived | 2.2             |
|           | BMb1617s   | 0             | NA                    | Singleton derived | 3.4             |
|           | BMb1599s   | 0             | NA                    | Singleton derived | 13.6            |
| BMb650s   | 0          | NA            | Singleton derived     | 4.1               |                 |
| BMb810s   | 0          | NA            | Singleton derived     | 1.9               |                 |
| b02d      | BMb125     | 117           | 95                    | Contig derived    | 0.0             |
|           | BMb180     | 179           | 115                   | Contig derived    | 23.3            |
|           | BMb1643s   | 0             | NA                    | Singleton derived | 25.0            |
|           | BMb700s    | 0             | NA                    | Singleton derived | 16.7            |
|           | BMb1163    | 1543          | 69                    | Contig derived    | 17.0            |
|           | BMb1186    | 2148          | 99                    | Contig derived    | 12.8            |
|           | BMb768s    | 0             | NA                    | Singleton derived | 8.7             |
|           | BMb1137    | 849           | 80                    | Contig derived    | 7.4             |

|          |      |     |                   |      |
|----------|------|-----|-------------------|------|
| BMb80    | 75   | 118 | Contig derived    | 13.0 |
| BMb1289  | 1239 | 88  | Contig derived    | 3.3  |
| BMb259   | 311  | 103 | Contig derived    | 6.7  |
| BMb252   | 282  | 84  | Contig derived    | 3.6  |
| BMb712s  | 0    | NA  | Singleton derived | 4.5  |
| BMb1131  | 725  | 95  | Contig derived    | 2.2  |
| BMb1605s | 0    | NA  | Singleton derived | 1.9  |
| BMb1594s | 0    | NA  | Singleton derived | 2.8  |
| BMb497   | 1593 | 85  | Contig derived    | 1.3  |
| BMb527   | 1833 | 96  | Contig derived    | 4.6  |
| BMb1583s | 0    | NA  | Singleton derived | 0.6  |
| BMb97    | 91   | 124 | Contig derived    | 0.6  |
| BMb420   | 1022 | 120 | Contig derived    | 3.1  |
| BMb1691s | 0    | NA  | Singleton derived | 0.6  |
| BMb1607s | 0    | NA  | Singleton derived | 2.4  |
| BMb1266  | 713  | 73  | Contig derived    | 3.0  |
| BMb1649s | 0    | NA  | Singleton derived | 1.4  |
| BMb1601s | 0    | NA  | Singleton derived | 4.2  |
| BMb1126  | 713  | 75  | Contig derived    | 0.7  |
| BMb1192  | 2266 | 106 | Contig derived    | 0.0  |
| BMb1194  | 2287 | 87  | Contig derived    | 2.1  |
| BMb1286  | 1191 | 126 | Contig derived    | 4.9  |
| BMb495   | 1579 | 74  | Contig derived    | 4.1  |
| BMb793s  | 0    | NA  | Singleton derived | 4.8  |
| BMb1692s | 0    | NA  | Singleton derived | 3.3  |
| BMb469   | 1428 | 115 | Contig derived    | 5.4  |
| BMb681s  | 0    | NA  | Singleton derived | 16.7 |
| BMb755s  | 0    | NA  | Singleton derived | 40.2 |
| BMb802s  | 0    | NA  | Singleton derived | 12.8 |
| BMb701s  | 0    | NA  | Singleton derived | 17.0 |

---

|      |          |      |     |                   |      |
|------|----------|------|-----|-------------------|------|
| b03c | BMb719s  | 0    | NA  | Singleton derived | 0.0  |
|      | BMb581   | 2427 | 65  | Contig derived    | 30.7 |
|      | BMb1706s | 0    | NA  | Singleton derived | 57.4 |
|      | BMb521   | 1782 | 120 | Contig derived    | 18.3 |
|      | BMb1648s | 0    | NA  | Singleton derived | 8.3  |
|      | BMb1632s | 0    | NA  | Singleton derived | 4.4  |
|      | BMb1215  | 2962 | 71  | Contig derived    | 3.3  |
|      | BMb339   | 502  | 102 | Contig derived    | 5.6  |
|      | BMb1188  | 2167 | 87  | Contig derived    | 2.9  |
|      | BMb247   | 272  | 88  | Contig derived    | 2.0  |
|      | BMb508   | 1648 | 102 | Contig derived    | 3.6  |
|      | BMb1203  | 2442 | 84  | Contig derived    | 3.6  |
|      | BMb1010  | 26   | 101 | Contig derived    | 1.4  |
|      | BMb506   | 1642 | 113 | Contig derived    | 2.0  |
|      | BMb191   | 196  | 85  | Contig derived    | 0.6  |
|      | BMb1113  | 612  | 100 | Contig derived    | 0.6  |

|          |      |     |                   |      |
|----------|------|-----|-------------------|------|
| BMb2     | 4    | 93  | Contig derived    | 1.9  |
| BMb1195  | 2298 | 107 | Contig derived    | 13.8 |
| BMb1259  | 517  | 86  | Contig derived    | 0.7  |
| BMb477   | 1447 | 145 | Contig derived    | 0.7  |
| BMb1674s | 0    | NA  | Singleton derived | 5.7  |
| BMb1600s | 0    | NA  | Singleton derived | 3.8  |
| BMb1730s | 0    | NA  | Singleton derived | 0.6  |
| BMb590   | 2469 | 100 | Contig derived    | 11.5 |
| BMb1171  | 1699 | 78  | Contig derived    | 12.0 |

---

|      |          |      |     |                   |      |
|------|----------|------|-----|-------------------|------|
| b04b | BMb1102  | 457  | 81  | Contig derived    | 0.0  |
|      | BMb831s  | 0    | NA  | Singleton derived | 17.6 |
|      | BMb686s  | 0    | NA  | Singleton derived | 11.8 |
|      | BMb548   | 2031 | 96  | Contig derived    | 0.7  |
|      | BMb488   | 1487 | 87  | Contig derived    | 9.3  |
|      | BMb1101  | 450  | 70  | Contig derived    | 6.9  |
|      | BMb1118  | 657  | 118 | Contig derived    | 3.8  |
|      | BMb1244  | 213  | 110 | Contig derived    | 1.2  |
|      | BMb1160  | 1533 | 71  | Contig derived    | 3.7  |
|      | BMb66    | 50   | 139 | Contig derived    | 5.1  |
|      | BMb866s  | 0    | NA  | Singleton derived | 5.9  |
|      | BMb1719s | 0    | NA  | Singleton derived | 1.3  |
|      | BMb133   | 133  | 103 | Contig derived    | 2.6  |
|      | BMb571   | 2295 | 74  | Contig derived    | 1.3  |
|      | BMb353   | 605  | 127 | Contig derived    | 0.0  |
|      | BMb1187  | 2154 | 62  | Contig derived    | 1.3  |
|      | BMb856s  | 0    | NA  | Singleton derived | 0.6  |
|      | BMb1602s | 0    | NA  | Singleton derived | 0.6  |
|      | BMb1679s | 0    | NA  | Singleton derived | 2.7  |
|      | BMb775s  | 0    | NA  | Singleton derived | 10.0 |
|      | BMb43    | 34   | 94  | Contig derived    | 31.3 |
|      | BMb857s  | 0    | NA  | Singleton derived | 0.0  |

---

|      |          |      |     |                   |      |
|------|----------|------|-----|-------------------|------|
| b05e | BMb705s  | 0    | NA  | Singleton derived | 0.0  |
|      | BMb1694s | 0    | NA  | Singleton derived | 9.3  |
|      | BMb821s  | 0    | NA  | Singleton derived | 5.9  |
|      | BMb698s  | 0    | NA  | Singleton derived | 7.5  |
|      | BMb318   | 436  | 79  | Contig derived    | 0.6  |
|      | BMb710s  | 0    | NA  | Singleton derived | 1.3  |
|      | BMb1016  | 40   | 152 | Contig derived    | 2.8  |
|      | BMb1182  | 2087 | 89  | Contig derived    | 1.2  |
|      | BMb813s  | 0    | NA  | Singleton derived | 3.6  |
|      | BMb121   | 111  | 125 | Contig derived    | 6.1  |
|      | BMb1619s | 0    | NA  | Singleton derived | 10.3 |
|      | BMb611   | 2765 | 105 | Contig derived    | 10.0 |
|      | BMb742s  | 0    | NA  | Singleton derived | 13.4 |
|      | BMb250   | 274  | 86  | Contig derived    | 1.5  |

|       |          |      |     |                   |      |
|-------|----------|------|-----|-------------------|------|
|       | BMb560   | 2170 | 73  | Contig derived    | 2.5  |
|       | BMb1071  | 267  | 115 | Contig derived    | 0.6  |
|       | BMb1575s | 0    | NA  | Singleton derived | 2.5  |
|       | BMb1661s | 0    | NA  | Singleton derived | 4.4  |
|       | BMb1650s | 0    | NA  | Singleton derived | 6.2  |
| <hr/> |          |      |     |                   |      |
| b06g  | BMb625s  | 0    | NA  | Singleton derived | 0.0  |
|       | BMb1688s | 0    | NA  | Singleton derived | 10.9 |
|       | BMb519   | 1747 | 93  | Contig derived    | 4.4  |
|       | BMb182   | 185  | 103 | Contig derived    | 5.5  |
|       | BMb341   | 527  | 90  | Contig derived    | 10.8 |
|       | BMb539   | 1891 | 94  | Contig derived    | 7.6  |
|       | BMb1279  | 947  | 74  | Contig derived    | 2.0  |
|       | BMb1108  | 530  | 128 | Contig derived    | 0.0  |
|       | BMb1061  | 238  | 82  | Contig derived    | 0.0  |
|       | BMb1158  | 1483 | 94  | Contig derived    | 0.0  |
|       | BMb419   | 1001 | 90  | Contig derived    | 6.5  |
|       | BMb1105  | 498  | 84  | Contig derived    | 8.4  |
|       | BMb1157  | 1372 | 106 | Contig derived    | 11.9 |
|       | BMb1682s | 0    | NA  | Singleton derived | 3.5  |
|       | BMb1705s | 0    | NA  | Singleton derived | 5.5  |
| <hr/> |          |      |     |                   |      |
| b07a  | BMb489   | 1497 | 64  | Contig derived    | 0.0  |
|       | BMb1148  | 1108 | 83  | Contig derived    | 2.5  |
|       | BMb751s  | 0    | NA  | Singleton derived | 19.1 |
|       | BMb1198  | 2339 | 90  | Contig derived    | 6.1  |
|       | BMb202   | 212  | 116 | Contig derived    | 22.3 |
|       | BMb799s  | 0    | NA  | Singleton derived | 16.7 |
|       | BMb1728s | 0    | NA  | Singleton derived | 7.0  |
|       | BMb160   | 159  | 92  | Contig derived    | 3.1  |
|       | BMb1142  | 957  | 86  | Contig derived    | 0.0  |
|       | BMb1080  | 352  | 99  | Contig derived    | 0.0  |
|       | BMb526   | 1832 | 110 | Contig derived    | 0.7  |
|       | BMb621   | 2916 | 149 | Contig derived    | 2.7  |
|       | BMb601   | 2606 | 74  | Contig derived    | 4.8  |
|       | BMb1703s | 0    | NA  | Singleton derived | 3.9  |
|       | BMb1275  | 839  | 75  | Contig derived    | 5.1  |
|       | BMb428   | 1099 | 87  | Contig derived    | 15.2 |
|       | BMb1117  | 628  | 106 | Contig derived    | 14.3 |
|       | BMb1620s | 0    | NA  | Singleton derived | 17.3 |
| <hr/> |          |      |     |                   |      |
| b08f  | BMb1208  | 2569 | 65  | Contig derived    | 0.0  |
|       | BMb531   | 1869 | 94  | Contig derived    | 10.1 |
|       | BMb1309  | 2155 | 67  | Contig derived    | 0.9  |
|       | BMb1671s | 0    | NA  | Singleton derived | 5.4  |
|       | BMb445   | 1142 | 77  | Contig derived    | 3.9  |
|       | BMb1684s | 0    | NA  | Singleton derived | 15.4 |

|          |      |     |                   |      |
|----------|------|-----|-------------------|------|
| BMb1319  | 2494 | 76  | Contig derived    | 4.3  |
| BMb1699s | 0    | NA  | Singleton derived | 6.7  |
| BMb386   | 769  | 104 | Contig derived    | 9.3  |
| BMb1055  | 195  | 89  | Contig derived    | 9.3  |
| BMb267   | 346  | 97  | Contig derived    | 0.6  |
| BMb1610s | 0    | NA  | Singleton derived | 2.6  |
| BMb847s  | 0    | NA  | Singleton derived | 3.4  |
| BMb174   | 172  | 99  | Contig derived    | 0.0  |
| BMb277   | 359  | 74  | Contig derived    | 0.7  |
| BMb1039  | 107  | 138 | Contig derived    | 1.3  |
| BMb529   | 1845 | 90  | Contig derived    | 2.5  |
| BMb578   | 2412 | 111 | Contig derived    | 1.8  |
| BMb362   | 665  | 149 | Contig derived    | 1.8  |
| BMb1736s | 0    | NA  | Singleton derived | 0.6  |
| BMb1668s | 0    | NA  | Singleton derived | 0.0  |
| BMb1229  | 2106 | 93  | Contig derived    | 4.7  |
| BMb1710s | 0    | NA  | Singleton derived | 5.1  |
| BMb1673s | 0    | NA  | Singleton derived | 1.9  |
| BMb1205  | 2464 | 54  | Contig derived    | 3.7  |
| BMb1297  | 1635 | 91  | Contig derived    | 3.1  |
| BMb1595s | 0    | NA  | Singleton derived | 1.2  |
| BMb871s  | 0    | NA  | Singleton derived | 6.5  |
| BMb475   | 1443 | 84  | Contig derived    | 3.2  |
| BMb474   | 1443 | 128 | Contig derived    | 3.1  |
| BMb559   | 2157 | 80  | Contig derived    | 0.7  |
| BMb1614s | 0    | NA  | Singleton derived | 5.8  |
| BMb266   | 342  | 82  | Contig derived    | 9.7  |
| BMb553   | 2134 | 93  | Contig derived    | 10.7 |
| BMb1654s | 0    | NA  | Singleton derived | 26.9 |
| BMb1196  | 2307 | 88  | Contig derived    | 1.9  |
| BMb745s  | 0    | NA  | Singleton derived | 10.1 |
| BMb1700s | 0    | NA  | Singleton derived | 26.3 |

---

|      |          |      |     |                   |      |
|------|----------|------|-----|-------------------|------|
| b09k | BMb773s  | 0    | NA  | Singleton derived | 0.0  |
|      | BMb683s  | 0    | NA  | Singleton derived | 5.7  |
|      | BMb279   | 367  | 96  | Contig derived    | 4.2  |
|      | BMb851s  | 0    | NA  | Singleton derived | 10.0 |
|      | BMb1277  | 888  | 124 | Contig derived    | 1.2  |
|      | BMb594   | 2534 | 88  | Contig derived    | 15.6 |
|      | BMb1645s | 0    | NA  | Singleton derived | 8.0  |
|      | BMb1685s | 0    | NA  | Singleton derived | 12.4 |
|      | BMb829s  | 0    | NA  | Singleton derived | 2.7  |
|      | BMb1119  | 668  | 107 | Contig derived    | 2.4  |
|      | BMb766s  | 0    | NA  | Singleton derived | 2.5  |
|      | BMb737s  | 0    | NA  | Singleton derived | 3.4  |
|      | BMb1625s | 0    | NA  | Singleton derived | 5.1  |
|      | BMb685s  | 0    | NA  | Singleton derived | 4.4  |

|      |          |      |     |                   |      |
|------|----------|------|-----|-------------------|------|
|      | BMb598   | 2543 | 90  | Contig derived    | 0.6  |
|      | BMb143   | 137  | 102 | Contig derived    | 2.7  |
|      | BMb493   | 1544 | 122 | Contig derived    | 10.6 |
|      | BMb1644s | 0    | NA  | Singleton derived | 11.5 |
|      | BMb1036  | 96   | 106 | Contig derived    | 15.6 |
|      | BMb264   | 331  | 107 | Contig derived    | 10.1 |
| b10i | BMb718s  | 0    | NA  | Singleton derived | 0.0  |
|      | BMb447   | 1154 | 102 | Contig derived    | 25.1 |
|      | BMb1222  | 31   | 113 | Contig derived    | 22.9 |
|      | BMb262   | 327  | 100 | Contig derived    | 14.7 |
|      | BMb276   | 358  | 89  | Contig derived    | 11.6 |
|      | BMb734s  | 0    | NA  | Singleton derived | 14.8 |
|      | BMb1206  | 2520 | 95  | Contig derived    | 7.9  |
|      | BMb532   | 1869 | 86  | Contig derived    | 10.6 |
|      | BMb1034  | 92   | 90  | Contig derived    | 8.4  |
|      | BMb1084  | 358  | 92  | Contig derived    | 0.0  |
|      | BMb221   | 241  | 80  | Contig derived    | 0.6  |
|      | BMb106   | 101  | 82  | Contig derived    | 0.0  |
|      | BMb152   | 142  | 122 | Contig derived    | 1.2  |
|      | BMb414   | 924  | 107 | Contig derived    | 1.9  |
|      | BMb1051  | 164  | 79  | Contig derived    | 5.0  |
|      | BMb96    | 90   | 139 | Contig derived    | 19.6 |
|      | BMb302   | 416  | 103 | Contig derived    | 5.7  |
|      | BMb1095  | 398  | 68  | Contig derived    | 13.0 |
| b11j | BMb730s  | 0    | NA  | Singleton derived | 0.0  |
|      | BMb1722s | 0    | NA  | Singleton derived | 8.8  |
|      | BMb816s  | 0    | NA  | Singleton derived | 10.9 |
|      | BMb32    | 27   | 109 | Contig derived    | 10.0 |
|      | BMb185   | 187  | 94  | Contig derived    | 6.7  |
|      | BMb310   | 426  | 93  | Contig derived    | 4.7  |
|      | BMb1093  | 395  | 117 | Contig derived    | 2.7  |
|      | BMb791s  | 0    | NA  | Singleton derived | 3.1  |
|      | BMb1228  | 63   | 108 | Contig derived    | 1.4  |
|      | BMb484   | 1458 | 117 | Contig derived    | 0.6  |
|      | BMb654s  | 0    | NA  | Singleton derived | 3.2  |
|      | BMb819s  | 0    | NA  | Singleton derived | 1.9  |
|      | BMb659s  | 0    | NA  | Singleton derived | 1.4  |
|      | BMb653s  | 0    | NA  | Singleton derived | 3.3  |
|      | BMb588   | 2467 | 102 | Contig derived    | 3.0  |
|      | BMb10    | 11   | 85  | Contig derived    | 3.9  |
|      | BMb1072  | 291  | 82  | Contig derived    | 0.6  |
|      | BMb619   | 2913 | 58  | Contig derived    | 15.9 |
|      | BMb1074  | 291  | 82  | Contig derived    | 0.6  |
|      | BMb1739s | 0    | NA  | Singleton derived | 2.5  |
|      | BMb1742s | 0    | NA  | Singleton derived | 3.9  |
